# Supplementary material for: Is higher serum cholesterol associated with altered tendon structure or tendon pain? A systematic review
Source: PubMed Central journal article supplement — Br J Sports Med. 2015 Oct 15;49(23):1504–9. doi: 10.1136/bjsports-2015-095100 (PMC4680137; doi:10.1136/bjsports-2015-095100), 2015-10-15
Supplement: bjsports-2015-095100-s1.pdf [file bjsports-2015-095100-s1.pdf]

## SUPPLEMENTAL APPENDICES

### Supplemental Appendix A: Complete List of Search Terms

Table 3

*Search Terms*

|                  | <b>Serum Lipid and Lip-lowering drugs</b>                                                                                                                                                                                                                | <b>Tendon Structure and Pathology</b>                                                                                                                                                                                                                                                                                                                                    |
|------------------|----------------------------------------------------------------------------------------------------------------------------------------------------------------------------------------------------------------------------------------------------------|--------------------------------------------------------------------------------------------------------------------------------------------------------------------------------------------------------------------------------------------------------------------------------------------------------------------------------------------------------------------------|
| <b>MeSH</b>      | Lipids/<br>exp Lipoproteins/<br>Cholesterol/                                                                                                                                                                                                             | exp Tendons/                                                                                                                                                                                                                                                                                                                                                             |
| <b>Free text</b> | Lipid*.ti,ab.<br>Cholesterol*.ti,ab.<br>Hyperlipid*.ti,ab.<br>Hypercholesterol*.ti,ab.<br>Triglyceride*.ti,ab.<br>Hypertriglyceride*.ti,ab.<br>High-density lipoprotein*.ti,ab.<br>Low-density lipoprotein*.ti,ab.                                       | Tendon structure*.ti,ab.<br>Tendon thickness*.ti,ab.                                                                                                                                                                                                                                                                                                                     |
| <b>MeSH</b>      | Hydroxymethylglutaryl-CoA<br>Reductase Inhibitors/<br>exp Lovastatin/                                                                                                                                                                                    | exp Tendon Injuries/<br>exp Tendinopathy/<br>Xanthomatosis/ AND exp Tendons/                                                                                                                                                                                                                                                                                             |
| <b>Free text</b> | Statin*.ti,ab.<br>Hydroxymethylglutaryl-CoA<br>Reductase Inhibitor*.ti,ab.<br>HMG-CoA.ti,ab.<br>Atorvastatin.ti,ab.<br>Fluvastatin.ti,ab.<br>Lovastatin.ti,ab.<br>Pitavastatin.ti,ab.<br>Pravastatin.ti,ab.<br>Rosuvastatin.ti,ab.<br>Simvastatin.ti,ab. | Tendon pain.ti,ab.<br>Tendon tear*.ti,ab.<br>Tendon strain*.ti,ab.<br>Tendon rupture*.ti,ab.<br>Tend#nopath*.ti,ab.<br>Tend#nitis.ti,ab.<br>Tend#nos#s.ti,ab.<br>Tenosynovitis.ti,ab.<br>Achillodynia.ti,ab.<br>Achilodynia.ti,ab.<br>Jumper* Knee.ti,ab.<br>Tennis Elbow.ti,ab.<br>Golfer* Elbow.ti,ab.<br>Epicondylitis.ti,ab.<br>Xanthoma*.ti,ab. ADJ5 Tendon*.ti,ab. |

MeSH = Medical Subject Heading

## Supplemental Appendix B: Quality Assessment of Included Papers

Example: Abate et al., 2014

| Abate et al., 2014      |                                                                                       |                                                                                                                                                                     |                     |
|-------------------------|---------------------------------------------------------------------------------------|---------------------------------------------------------------------------------------------------------------------------------------------------------------------|---------------------|
| No.                     | Criterion                                                                             | Decision Rule                                                                                                                                                       | Score<br>Y=1<br>N=0 |
| <b>STUDY POPULATION</b> |                                                                                       |                                                                                                                                                                     |                     |
| 1                       | Is the method of recruitment and eligibility criteria reported?                       | Yes if the study states how participants were recruited, and clear eligibility criteria for participant inclusion and/or exclusion were reported                    | Y                   |
| 2                       | Are the participants representative of the population from which they were recruited? | Yes if the study states that consecutive eligible patients were used, participants were randomly selected, or all participants were used from the source population | N                   |
| 3                       | Is there evidence that the controls are free from disease?                            | Yes if evidence is supplied that the controls are not exposed to the disease                                                                                        | Y                   |
| 4                       | Are both groups drawn from the same population?                                       | Yes if both the case and control group were drawn from the same source population                                                                                   | Y                   |
| 5                       | Are potential confounding factors identified?                                         | Yes if the cases and controls were matched with respect to the potential confounding factors (age, sex, BMI)                                                        | N                   |
| <b>OUTCOME</b>          |                                                                                       |                                                                                                                                                                     |                     |
| 6                       | Were lipid levels assessed identically?                                               | Yes if the method for the collection and the analysis of the lipid levels were done in an identical way for the entire population                                   | N                   |
| 7                       | Valid definitions                                                                     | Yes if the method used for assessing tendon structure or tendon pain was defined and explained with reference to its validity                                       | Y                   |
| 8                       | Was tendon structure or tendon pain assessed identically?                             | Yes if the methods for assessing tendon structure or tendon pain were measured in an identical way for the entire population                                        | Y                   |
| 9                       | Was assessor blinding reported?                                                       | Outcomes and variables were measured by assessors independently, without any knowledge of the key confounding outcome or grouping variables within the study        | N                   |
| <b>STUDY DESIGN</b>     |                                                                                       |                                                                                                                                                                     |                     |

|                 |                                                 |                                                                                                                                                                                        |      |
|-----------------|-------------------------------------------------|----------------------------------------------------------------------------------------------------------------------------------------------------------------------------------------|------|
| 10              | Were data available for >80% of those enrolled? | Yes if data were available for at least 80% of all participants enrolled in the study                                                                                                  | N    |
| <b>ANALYSIS</b> |                                                 |                                                                                                                                                                                        |      |
| 11              | Appropriate analysis                            | Yes if data are supplied that allows for the reader to determine if the relationship between abnormal lipid levels and change in tendon structure or pain is statistically significant | Y    |
|                 |                                                 | SCORE                                                                                                                                                                                  | 6/11 |
|                 |                                                 | PERCENTAGE                                                                                                                                                                             | 55%  |

## Supplemental Appendix C: Programs and formulas

Cholesterol Unit Conversion:

To convert milligrams per decileter (mg/dL) to millimole per litre (mmol/L), values should be divided by:

- 38.67 for total cholesterol, HDL and LDL
- 88.57 for triglycerides

\*Figures taken from ‘Screening for Lipid Disorders in Children and Adolescents – Evidence Synthesis’ by Haney, E., Huffman, L., Bougatsos, C et al (2007). Agency for Healthcare Research and Quality (US).

Engauge Digitilizer 4.1:

Engauge Digitilizer 4.1 was developed by Mark Mitch in 2010.

Figure 6. Data extraction using Engauge Digitilizer

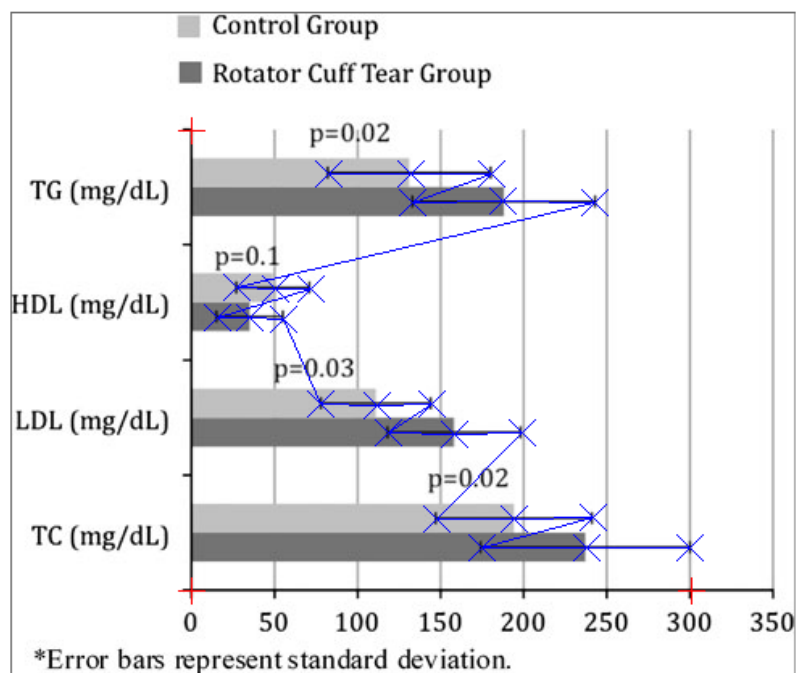

## Supplemental Appendix D: Summary of Quality Assessment Results

Table 4

*Summary of Quality Assessment Results*

| Author (Year)     | 1 | 2 | 3 | 4 | 5 | 6   | 7 | 8 | 9 | 10  | 11 | Score         |
|-------------------|---|---|---|---|---|-----|---|---|---|-----|----|---------------|
| Abbate (2014)     | ✓ | ✗ | ✓ | ✓ | ✗ | ✗   | ✓ | ✓ | ✗ | ✗   | ✓  | 6/11<br>(55%) |
| Abboud (2010)     | ✓ | ✗ | ✓ | ✓ | ✓ | ✓   | ✓ | ✓ | ✗ | ✓   | ✓  | 9/11<br>(82%) |
| Beri (2009)       | ✓ | ✓ | ✓ | ✓ | ✓ | N/A | ✗ | ✗ | ✗ | N/A | ✓  | 6/9<br>(67%)  |
| Descamps (2001)   | ✗ | ✗ | ✓ | ✗ | ✓ | ✗   | ✓ | ✓ | ✗ | N/A | ✓  | 5/10<br>(50%) |
| Durrington (1982) | ✗ | ✗ | ✓ | ✗ | ✓ | ✗   | ✓ | ✓ | ✗ | ✓   | ✓  | 6/11<br>(55%) |
| Gaida (2009)      | ✓ | ✗ | ✓ | ✗ | ✓ | ✓   | ✓ | ✗ | ✓ | N/A | ✓  | 7/10<br>(70%) |
| Gattereau (1973)  | ✓ | ✗ | ✓ | ✗ | ✓ | ✗   | ✓ | ✓ | ✗ | N/A | ✓  | 6/10<br>(60%) |
| Junyent (2005)    | ✓ | ✓ | ✓ | ✗ | ✓ | ✓   | ✓ | ✓ | ✗ | N/A | ✓  | 8/10<br>(80%) |
| Klemp (1993)      | ✓ | ✓ | ✓ | ✗ | ✓ | ✗   | ✓ | ✓ | ✗ | N/A | ✓  | 7/10<br>(70%) |
| Kwak (2013)       | ✓ | ✗ | ✓ | ✓ | ✗ | ✗   | ✓ | ✓ | ✗ | ✓   | ✗  | 6/11<br>(55%) |

|                 |   |   |     |     |     |   |   |   |   |     |   |               |
|-----------------|---|---|-----|-----|-----|---|---|---|---|-----|---|---------------|
| Longo (2010)    | ✓ | ✗ | ✓   | ✓   | ✓   | ✓ | ✓ | ✓ | ✗ | N/A | ✓ | 8/10<br>(80%) |
| Mabuchi (1977)  | ✗ | ✗ | ✓   | ✗   | ✗   | ✗ | ✓ | ✓ | ✗ | ✓   | ✓ | 5/11<br>(45%) |
| Mabuchi (1978)  | ✓ | ✓ | ✓   | ✗   | ✗   | ✓ | ✓ | ✓ | ✗ | ✗   | ✓ | 7/11<br>(64%) |
| Ozgurtas (2003) | ✗ | ✗ | ✗   | ✗   | ✗   | ✗ | ✓ | ✗ | ✗ | N/A | ✓ | 2/10<br>(20%) |
| Rechardt (2013) | ✓ | ✓ | N/A | N/A | N/A | ✓ | ✓ | ✓ | ✗ | ✗   | ✓ | 6/8<br>(75%)  |
| Tsouli (2009)   | ✓ | ✗ | ✓   | ✗   | ✓   | ✓ | ✓ | ✓ | ✗ | ✓   | ✓ | 8/11<br>(73%) |
| Yuzawa (1989)   | ✗ | ✗ | ✓   | ✗   | ✗   | ✓ | ✓ | ✓ | ✗ | ✓   | ✓ | 6/11<br>(55%) |

---

✓ = yes, ✗ = no, N/A = not applicable

## Supplemental Appendix E: Results Tables

Table 4  
*Participants*

| Author<br>(Year) |         | Population                                                            | Setting                                              | Number<br>recruited | Age<br>(years)               | Gender<br>(male/female) | BMI <sup>†</sup><br>(kg/m <sup>2</sup> ) |
|------------------|---------|-----------------------------------------------------------------------|------------------------------------------------------|---------------------|------------------------------|-------------------------|------------------------------------------|
| Abate<br>(2014)  | Case    | Rotator cuff full-thickness tears (pre- and post-menopausal women)    | Echography unit of department for lower limb disease | 27                  | Mean = 50.9<br>SD = 4.1      | 0/27                    | Mean = 27.5<br>SD = 3.1                  |
|                  | Control | No rotator cuff full-thickness tears (pre- and post-menopausal women) | Echography unit of department for lower limb disease | 205                 | Mean = 49.7<br>SD = 4.0      | 0/205                   | Mean = 23.7<br>SD = 3.0                  |
| Abboud<br>(2010) | Case    | Full-thickness rotator cuff tears                                     | Outpatient tertiary care clinic                      | 80<br>(6 excluded)  | Mean = 66.1<br>Range = 21-93 | 44/30                   | Mean = 30.3                              |
|                  | Control | Shoulder complaint, normal rotator cuff                               | Outpatient tertiary care clinic                      | 80<br>(7 excluded)  | Mean = 67.2<br>Range = 21-93 | 39/34                   | Mean = 28.7                              |
| Beri             | Case    | Patients billed with a                                                | University-based                                     | 93                  | Mean = 49.04                 | 64/29                   |                                          |

|                   |         |                                                                           |                                                                     |     |                                                                |               |                                                                      |
|-------------------|---------|---------------------------------------------------------------------------|---------------------------------------------------------------------|-----|----------------------------------------------------------------|---------------|----------------------------------------------------------------------|
| (2009)            |         | discharge diagnosis of tendon rupture                                     | multispecialty group practice in East Lansing, MI.                  |     | SD = 17.2                                                      |               | -                                                                    |
|                   | Control | Randomly selected patients who did not have tendon rupture                | University-based multispecialty group practice in East Lansing, MI. | 279 | Mean = 49.04<br>SD = 17.2                                      | 192/87        | -                                                                    |
| Descamps (2001)   | Case    | Genetically ascertained FH individuals                                    | Not stated                                                          | 127 | FH (excluded)                                                  | FH (excluded) | FH (excluded)                                                        |
|                   | Control | Individuals with a negative genetic test for ApoB3500 and LDL-R mutations | Not stated                                                          | 160 | Men:<br>Mean = 50<br>SD = 11<br>Women:<br>Mean = 51<br>SD = 13 | 88/72         | Men:<br>Mean = 28.7<br>SD = 3.4<br>Women:<br>Mean = 28.3<br>SD = 4.8 |
| Durrington (1982) | Case    | Patients with primary hypercholesterolaemia                               | Patients attending either a Lipid Clinic or a Metabolic Clinic      | 32  | FH (excluded)                                                  | FH (excluded) | FH (excluded)                                                        |
|                   | Control | Normolipidaemic volunteers                                                | Volunteers                                                          | 11  | Mean = 44<br>SD = 4                                            | 4/7           | Mean = 28.7<br>SD = 4                                                |
| Gaida (2009)      | Case    | Diagnosed with mid-portion Achilles tendinopathy                          | Sports Medicine Unit, Umeå University, Sweden                       | 60  | Mean = 48<br>SD = 9.4                                          | 32/28         | Mean = 25.4<br>SD = 2.8                                              |



|                  |         |                                                          |                                                                                                    |    |                            |               |                          |
|------------------|---------|----------------------------------------------------------|----------------------------------------------------------------------------------------------------|----|----------------------------|---------------|--------------------------|
|                  | Control | No history of tendon injury                              | Member of the general community                                                                    | 60 | Mean = 47<br>SD = 9.7      | 32/28         | Mean = 25.4<br>SD = 2.7  |
| Gattereau (1973) | Case    | Classified as having type II hypercholesterolemia        | Clinic of Nutrition, Metabolism and Atherosclerosis of the Clinical Research Institute of Montreal | 32 | Mean = 34.6<br>SD/R = -    | 13/19         | Mean = 22.02<br>SD/R = - |
|                  | Control | Classified as normolipemic                               | Clinic of Nutrition, Metabolism and Atherosclerosis of the Clinical Research Institute of Montreal | 32 | Mean = 34.05<br>SD/R = -   | 18/14         | Mean = 23.97<br>SD/R = - |
| Junyent (2005)   | Case    | Adults with a diagnosis of primary hypercholesterolaemia | Attending the Lipid Clinic of Hospital Clinic, Barcelona.                                          | 81 | FH (excluded)              | FH (excluded) | FH (excluded)            |
|                  | Control | Normolipidaemic participants                             | Recruited from hospital personnel and lists of primary health physicians.                          | 88 | Mean = 48<br>Range = 26-81 | 37/51         | Mean = 25.8<br>SD = 4.2  |
| Klemp (1993)     | Case    | Patients with hyperlipidaemia                            | The lipid clinic at Tygerberg Hospital                                                             | 88 | Mean = 48<br>Range= 19-69  | 42/46         | -                        |
|                  | Control | Volunteers with normal lipid profiles                    | Volunteers                                                                                         | 88 | -                          | -             | -                        |

|                |         |                                                                 |                                                                                  |     |                               |               |                          |
|----------------|---------|-----------------------------------------------------------------|----------------------------------------------------------------------------------|-----|-------------------------------|---------------|--------------------------|
| Kwak (2013)    | Case    | Patients with dyslipidaemia                                     | Cardiovascular Center of National Health Insurance Service (NHIS) Ilsan hospital | 19  | Mean = 60.0<br>SD = 12.5      | 6/13          | Mean = 25.2<br>SD = 1.9  |
|                | Control | Normolipidaemic controls                                        | Cardiovascular Center of National Health Insurance Service (NHIS) Ilsan hospital | 96  | Mean = 62.3<br>SD = 8.5       | 62/34         | Mean = 24.2<br>SD = 2.6  |
| Longo (2010)   | Case    | Patients who underwent arthroscopic repair of rotator cuff tear | University teaching hospital                                                     | 120 | Mean = 64.86<br>Range = 40-83 | 45/75         | Mean = 27.62<br>SD/R = - |
|                | Control | Patients who underwent arthroscopic meniscectomy                | University teaching hospital                                                     | 120 | Mean = 63.91<br>Range = 38-78 | 45/75         | Mean = 27.32<br>SD/R = - |
| Mabuchi (1977) | Case    | Familial hypercholesterolaemic patients                         | Not stated                                                                       | 18  | FH (excluded)                 | FH (excluded) | FH (excluded)            |
|                | Control | Normal participants                                             | Not stated                                                                       | 36  | Not stated                    | Not stated    | Not stated               |
| Mabuchi (1978) | Case    | Familial hypercholesterolaemic patients                         | Not stated                                                                       | 112 | FH (excluded)                 | FH (excluded) | FH (excluded)            |
|                | Control | Normal participants with no disease associated with lipid       | Not stated                                                                       | 36  | Mean = 56<br>SD = 12          | Not stated    | Not stated               |

metabolism

|                 |         |                                                                                                             |                                                                                 |     |                         |                  |                         |
|-----------------|---------|-------------------------------------------------------------------------------------------------------------|---------------------------------------------------------------------------------|-----|-------------------------|------------------|-------------------------|
| Ozgurtas (2003) | Case    | Patients with Achilles tendon rupture                                                                       | Department of Orthopedics and Traumatology of Gu'lhane Military Medical Academy | 47  | Mean = 25.7<br>SD/R = - | 41/6             | -                       |
|                 | Control | Individuals without Achilles tendon rupture                                                                 | -                                                                               | 26  | Mean = 32.6<br>SD/R = - | 20/6             | -                       |
| Rechartd (2013) | Case    | Patients seeking medical advice for incipient upper extremity pain                                          | Three occupational healthcare units in Helsinki                                 | 163 | Mean = 45<br>SD = 9.8   | 23/140           | Mean = 25.5<br>SD = 4.3 |
|                 | Control | *Cross-sectional study – no control group*                                                                  |                                                                                 |     |                         |                  |                         |
| Tsouli (2009)   | Case    | Unrelated patients with herterozygous familial hypercholesterolaemia                                        | Not stated                                                                      | 80  | FH<br>(excluded)        | FH<br>(excluded) | FH<br>(excluded)        |
|                 | Control | Normolipidemic, sex- and age-matched, apparently healthy volunteers with no history of hypercholesterolemia | Not stated                                                                      | 80  | Mean = 43.0<br>SD = 9.7 | 30/50            | Mean = 25.1<br>SD = 6.5 |
| Yuzawa (1989)   | Case    | Japanese patients with heterozygous familial                                                                | Not stated                                                                      | 15  | FH<br>(excluded)        | FH<br>(excluded) | FH<br>(excluded)        |

hypercholesterolaemia

|         |                                    |                  |    |                      |       |            |
|---------|------------------------------------|------------------|----|----------------------|-------|------------|
| Control | Normocholesterolaemic participants | University staff | 34 | Mean = 45<br>SD = 11 | 17/17 | Not stated |
|---------|------------------------------------|------------------|----|----------------------|-------|------------|

---

† BMI = Body Mass Index

Table 5  
Lipid Assessment

| Author (Year)     |         | Fasting (Yes/No) | Total cholesterol Mean (SD or Range) mmol/L | HDL <sup>†</sup> Mean (SD or Range) mmol/L | LDL <sup>†</sup> Mean (SD or Range) mmol/L | Triglycerides Mean (SD or Range) mmol/L  | Statin use    |
|-------------------|---------|------------------|---------------------------------------------|--------------------------------------------|--------------------------------------------|------------------------------------------|---------------|
| Abate (2014)      | Case    | Yes              | 5.15 (0.62)                                 | 1.23 (0.15)                                | -                                          | 1.50 (0.59)                              | Not stated    |
|                   | Control | Yes              | 4.88 (0.67)                                 | 1.44 (0.22)                                | -                                          | 1.27 (0.45)                              | Not stated    |
| Abboud (2010)     | Case    | -                | 6.13 (1.63)                                 | 0.91 (0.52)                                | 4.09 (1.03)                                | 2.11 (0.61)                              | -             |
|                   | Control | -                | 5.02 (1.22)                                 | 1.29 (0.57)                                | 2.87 (0.85)                                | 1.49 (0.54)                              | No            |
| Beri (2009)       | Case    | -                | -                                           | -                                          | -                                          | -                                        | 24.7 %        |
|                   | Control | -                | -                                           | -                                          | -                                          | -                                        | 24.7 %        |
| Descamps (2001)   | Case    | FH (excluded)    | FH (excluded)                               | FH (excluded)                              | FH (excluded)                              | FH (excluded)                            | FH (excluded) |
|                   | Control | Not stated       | Men = 7.16 (1.66)<br>Women = 7.32 (1.37)    | Men = 1.24 (0.36)<br>Women = 1.40 (0.47)   | Men = 4.78 (1.60)<br>Women = 5.07 (1.34)   | Men = 3.06 (2.36)<br>Women = 2.26 (2.01) | Not stated    |
| Durrington (1982) | Case    | FH (excluded)    | FH (excluded)                               | FH (excluded)                              | FH (excluded)                              | FH (excluded)                            | FH (excluded) |
|                   | Control | Not stated       | 5.2 (0.30)                                  | -                                          | -                                          | -                                        | Not stated    |
| Gaida (2009)      | Case    | Yes              | 5.47 (1.02)                                 | 1.44 (0.39)                                | 3.37 (0.86)                                | 1.22 (0.77)                              | 6 %           |
|                   | Control | Yes              | 5.16 (1.00)                                 | 1.58 (0.48)                                | 3.14 (0.93)                                | 0.96 (0.47)                              | No            |
| Gattereau (1973)  | Case    | -                | Men = 7.9 (1.06)<br>Women = 9.69 (1.72)     | -                                          | -                                          | Men = 1.3 (0.30)<br>Women = 1.14 (0.21)  | -             |
|                   | Control | -                | Men = 4.42 (0.40)                           | -                                          | -                                          | Men = 0.96 (0.21)                        | -             |



|                  |                 |                             |                              |                              |                    |                              |                             |
|------------------|-----------------|-----------------------------|------------------------------|------------------------------|--------------------|------------------------------|-----------------------------|
| (2009)           | Control         | Yes                         | 5.22 (0.83)                  | 1.32 (0.23)                  | 3.52 (0.67)        | 0.90 (0.50)                  | No                          |
| Yuzawa<br>(1989) | Case<br>Control | FH (excluded)<br>Not stated | FH (excluded)<br>4.55 (0.78) | FH (excluded)<br>1.32 (0.28) | FH (excluded)<br>- | FH (excluded)<br>1.29 (0.61) | FH (excluded)<br>Not stated |

---

† HDL = High-density lipoprotein, LDL = Low-density lipoprotein

Table 6  
Results

| Author (Year)     | Relationship investigated              | Effect size (95% CI)                                                                                                  | Univariate Odds Ratio (95% CI)                                                                                           | Multivariate Odds Ratio (95% CI)                                                                                          | Other                                                            |
|-------------------|----------------------------------------|-----------------------------------------------------------------------------------------------------------------------|--------------------------------------------------------------------------------------------------------------------------|---------------------------------------------------------------------------------------------------------------------------|------------------------------------------------------------------|
| Abate (2014)      | Rotator cuff tears and lipid levels    | -                                                                                                                     | -                                                                                                                        | -                                                                                                                         | Predictor coefficient (of RC tears):<br>HDL = -0.228 (p = 0.001) |
| Abboud (2010)     | Rotator cuff tear and lipid levels     | TC† = 1.11 (0.64 to 1.58)<br>HDL† = -0.38 (-0.56 to -0.20)<br>LDL† = 1.22 (0.91 to 1.53)<br>TG† = 0.62 (0.43 to 0.81) | -                                                                                                                        | -                                                                                                                         | -                                                                |
| Beri (2009)       | Statins and tendon rupture             | -                                                                                                                     | All = 1.00 (0.54 to 1.84),<br>p = 1.0<br>Men = 0.62 (0.30 to 1.30),<br>p = 0.20<br>Women = 3.09 (1.04 to 9.75), p = 0.04 | All = 1.1 (0.57 to 2.13),<br>p = 0.76<br>Men = 0.66 (0.29 to 1.51),<br>p = 0.32<br>Women = 3.76 (1.11 to 12.75), p = 0.03 | -                                                                |
| Descamps (2001)   | No relevant analyses were conducted    | -                                                                                                                     | -                                                                                                                        | -                                                                                                                         | -                                                                |
| Durrington (1982) | No relevant analyses were conducted    | -                                                                                                                     | -                                                                                                                        | -                                                                                                                         | -                                                                |
| Gaida (2009)      | Achilles tendinopathy and lipid levels | TC = 0.31 (-0.06 to 0.66)<br>HDL = -0.32 (-0.68 to 0.04)<br>LDL = 0.26 (-0.1 to 0.61)                                 | -                                                                                                                        | -                                                                                                                         | -                                                                |



TG = 0.41 (0.4 to 0.77)

|                  |                                                         |                                                          |   |   |                                                                                                                                                           |
|------------------|---------------------------------------------------------|----------------------------------------------------------|---|---|-----------------------------------------------------------------------------------------------------------------------------------------------------------|
| Gattereau (1973) | Non-familial hyperlipidemia and tendon thickness        | Men = 0.95 (0.19 to 1.71)<br>Women = 0.86 (0.13 to 1.58) | - | - | -                                                                                                                                                         |
| Junyent (2005)   | No relevant analyses were conducted                     | -                                                        | - | - | -                                                                                                                                                         |
| Klemp (1993)     | Musculoskeletal manifestations and Mixed hyperlipidemia | -                                                        | - | - | -                                                                                                                                                         |
| Kwak (2013)      | ATT and lipid levels                                    | -                                                        | - | - | Pearson's correlation (r) for:<br>ATT and TC = -0.09<br>ATT and HDL = -0.06<br>ATT and LDL = -0.03<br>ATT and TG = -0.04<br>*all results not sig (p>0.05) |
| Longo (2010)     | RC tears and lipid levels                               | TC = 0.08 (-0.18 to 0.33)<br>TG = 0.20 (-0.05 to 0.46)   | - | - | -                                                                                                                                                         |
| Mabuchi (1977)   | ATT and serum cholesterol                               | -                                                        | - | - | r = 0.454, p<0.01                                                                                                                                         |

|                    |                                          |                                                                                                              |   |             |             |   |
|--------------------|------------------------------------------|--------------------------------------------------------------------------------------------------------------|---|-------------|-------------|---|
| Mabuchi<br>(1978)  | No relevant analyses were conducted      | -                                                                                                            | - | -           | -           | - |
| Ozgurtas<br>(2003) | Achilles tendon rupture and lipid levels | TC = 2.13 (1.52 to 2.7)<br>HDL = -0.49 (-0.97 to 0)<br>LDL = 2.13 (1.42 to 2.69)<br>TG = 0.55 (0.06 to 1.03) | - | -           | -           | - |
| Rechardt<br>(2013) | Pain intensity and lipid levels          | -                                                                                                            | - | OR          | CI          | - |
|                    |                                          |                                                                                                              |   | TC > 5.3:   | 1.8 0.8-4.0 |   |
|                    |                                          |                                                                                                              |   | HDL < 1.48: | 2.7 1.2-6.3 |   |
|                    |                                          |                                                                                                              |   | LDL > 3.3:  | 1.7 0.7-4.2 |   |
|                    |                                          |                                                                                                              |   | TG > 1.08:  | 2.8 1.2-6.6 |   |
|                    |                                          |                                                                                                              |   | Statin      | 0.9 0.2-4.3 |   |
| Tsouli<br>(2009)   | No relevant analyses were conducted      | -                                                                                                            | - | -           | -           | - |
| Yuzawa<br>(1989)   | No relevant analyses were conducted      | -                                                                                                            | - | -           | -           | - |

---

†TC = total cholesterol, HDL = high-density lipoprotein, LDL = low-density lipoprotein, TG = triglycerides

## Supplemental Appendix F: Pooled mean and SD calculation

The excel formula for calculating pooled mean is

$$=(D3*B3+D4*B4)/(D3+D4)$$

Where B3 and D3 are the mean and sample size of one study, and B4 and D4 are the mean and sample size of another study

The excel formula for calculating pooled standard deviation (SD) is

$$=SQRT((((D3-1)*C3^2)+((D4-1)*C4^2)+((D3*D4)/(D3+D4))*(B3-B4)^2)/(D3+D4-1))$$

Where B3, C3 and D3 are the mean, SD and sample size of one study and B4,C4, D4 are the mean, SD and sample size of another study
