# Supplementary material for: Is higher serum cholesterol associated with altered tendon structure or tendon pain? A systematic review
Source: PubMed Central journal article supplement — Br J Sports Med. 2015 Oct 15;49(23):1504–9. doi: 10.1136/bjsports-2015-095100 (PMC4680137; doi:10.1136/bjsports-2015-095100), 2015-10-15
Supplement: bjsports-2015-095100-s2.pdf [file bjsports-2015-095100-s2.pdf]

## References

1. Cook JL, Khan KM, Maffulli N, Purdam C. Overuse tendinosis, not tendinitis part 2: applying the new approach to patellar tendinopathy. *The Physician and sportsmedicine* 2000;28(6):31-46.
2. Khan KM, Cook JL, Taunton JE, Bonar F. Overuse tendinosis, not tendinitis part 1: a new paradigm for a difficult clinical problem. *The Physician and sportsmedicine* 2000;28(5):38-48.
3. Kujala UM, Sarna S, Kaprio J. Cumulative incidence of achilles tendon rupture and tendinopathy in male former elite athletes. *Clinical journal of sport medicine : official journal of the Canadian Academy of Sport Medicine* 2005;15(3):133-5.
4. Rolf C, Movin T. Etiology, histopathology, and outcome of surgery in achillodynia. *Foot & ankle international. / American Orthopaedic Foot and Ankle Society [and] Swiss Foot and Ankle Society* 1997;18(9):565-9.
5. Holmes GB, Lin J. Etiologic factors associated with symptomatic achilles tendinopathy. *Foot & ankle international. / American Orthopaedic Foot and Ankle Society [and] Swiss Foot and Ankle Society* 2006;27(11):952-9.
6. Gaida JE, Alfredson L, Kiss ZS, Wilson AM, Alfredson H, Cook JL. Dyslipidemia in Achilles tendinopathy is characteristic of insulin resistance. *Medicine and science in sports and exercise* 2009;41(6):1194-7.
7. Gaida JE, Ashe MC, Bass SL, Cook JL. Is adiposity an under-recognized risk factor for tendinopathy? A systematic review. *Arthritis and rheumatism* 2009;61(6):840-9.
8. Abate M, Schiavone C, Di Carlo L, Salini V. Prevalence of and risk factors for asymptomatic rotator cuff tears in postmenopausal women. *Menopause* 2014;21(3):275-80.
9. Gordon T, Castelli WP, Hjortland MC, Kannel WB, Dawber TR. High density lipoprotein as a protective factor against coronary heart disease. The Framingham Study. *The American journal of medicine* 1977;62(5):707-14.
10. Adams CW, Bayliss OB, Baker RW, Abdulla YH, Hunter-Craig CJ. Lipid deposits in ageing human arteries, tendons and fascia. *Atherosclerosis* 1974;19(3):429-40.
11. Finlayson R, Woods SJ. Lipid in the Achilles tendon. A comparative study. *Atherosclerosis* 1975;21(3):371-89.
12. Jozsa L, Reffy A, Balint JB. The pathogenesis of tendolipomatosis; an electron microscopical study. *Int Orthop* 1984;7(4):251-5.
13. Junyent M, Gilabert R, Zambon D, Nunez I, Vela M, Civeira F, et al. The use of Achilles tendon sonography to distinguish familial hypercholesterolemia from other genetic dyslipidemias. *Arteriosclerosis, thrombosis, and vascular biology* 2005;25(10):2203-8.
14. Tsouli SG, Xydis V, Argyropoulou MI, Tselepis AD, Elisaf M, Kiortsis DN. Regression of Achilles tendon thickness after statin treatment in patients with familial hypercholesterolemia: an ultrasonographic study. *Atherosclerosis* 2009;205(1):151-5.
15. Beeharry D, Coupe B, Benbow EW, Morgan J, Kwok S, Charlton-Menys V, et al. Familial hypercholesterolaemia commonly presents with Achilles tenosynovitis. *Annals of the rheumatic diseases* 2006;65(3):312-5.

16. Holven KB, Narverud I, Lindvig HW, Halvorsen B, Langslet G, Nenseter MS, et al. Subjects with familial hypercholesterolemia are characterized by an inflammatory phenotype despite long-term intensive cholesterol lowering treatment. *Atherosclerosis* 2014;233(2):561-7.
17. Moore KJ, Tabas I. Macrophages in the pathogenesis of atherosclerosis. *Cell* 2011;145(3):341-55.
18. Williams KJ, Tabas I. The response-to-retention hypothesis of early atherogenesis. *Arteriosclerosis, thrombosis, and vascular biology* 1995;15(5):551-61.
19. Gustafsson M, Boren J. Mechanism of lipoprotein retention by the extracellular matrix. *Current opinion in lipidology* 2004;15(5):505-14.
20. Rader DJ, Pure E. Lipoproteins, macrophage function, and atherosclerosis: beyond the foam cell? *Cell metabolism* 2005;1(4):223-30.
21. Tabas I. Consequences of cellular cholesterol accumulation: basic concepts and physiological implications. *The Journal of clinical investigation* 2002;110(7):905-11.
22. Tall AR, Yvan-Charvet L. Cholesterol, inflammation and innate immunity. *Nature reviews. Immunology* 2015;15(2):104-16.
23. Kragstnaes MS, Fredberg U, Stribolt K, Kjaer SG, Bendix K, Ellingsen T. Stereological quantification of immune-competent cells in baseline biopsy specimens from achilles tendons: results from patients with chronic tendinopathy followed for more than 4 years. *Am J Sports Med* 2014;42(10):2435-45.
24. Scott A, Lian O, Bahr R, Hart DA, Duronio V, Khan KM. Increased mast cell numbers in human patellar tendinosis: correlation with symptom duration and vascular hyperplasia. *British journal of sports medicine* 2008;42(9):753-7.
25. Fearon AM, Twin J, Dahlstrom JE, Cook JL, Cormick W, Smith PN, et al. Increased substance P expression in the trochanteric bursa of patients with greater trochanteric pain syndrome. *Rheumatology international* 2014;34(10):1441-8.
26. Gaida JE, Bagge J, Purdam C, Cook J, Alfredson H, Forsgren S. Evidence of the TNF-alpha system in the human Achilles tendon: expression of TNF-alpha and TNF receptor at both protein and mRNA levels in the tenocytes. *Cells, tissues, organs* 2012;196(4):339-52.
27. Medzhitov R. Origin and physiological roles of inflammation. *Nature* 2008;454(7203):428-35.
28. Mathiak G, Wening JV, Mathiak M, Neville LF, Jungbluth KH. Serum cholesterol is elevated in patients with Achilles tendon ruptures. *Archives of Orthopaedic and Trauma Surgery* 1999;119(5-6):280-84.
29. Ozgurtas T, Yildiz C, Serdar M, Atesalp S, Kutluay T. Is high concentration of serum lipids a risk factor for Achilles tendon rupture? *Clinica chimica acta; international journal of clinical chemistry* 2003;331(1-2):25-8.
30. Franssen R, Monajemi H, Stroes ES, Kastelein JJ. Obesity and dyslipidemia. *Endocrinology and metabolism clinics of North America* 2008;37(3):623-33, viii.
31. Downs SH, Black N. The feasibility of creating a checklist for the assessment of the methodological quality both of randomised and non-randomised studies of health care interventions. *Journal of epidemiology and community health* 1998;52(6):377-84.
32. Abboud JA, Kim JS. The effect of hypercholesterolemia on rotator cuff disease. *Clinical orthopaedics and related research* 2010;468(6):1493-7.

33. Beri A, Dwamena FC, Dwamena BA. Association between statin therapy and tendon rupture: a case-control study. *Journal of cardiovascular pharmacology* 2009;53(5):401-4.
34. Longo UG, Franceschi F, Spiezia F, Forriol F, Maffulli N, Denaro V. Triglycerides and total serum cholesterol in rotator cuff tears: do they matter? *British journal of sports medicine* 2010;44(13):948-51.
35. Gattereau A, Davignon J, Langelier M, Levesque HP. An improved radiological method for the evaluation of Achilles tendon xanthomatosis. *Canadian Medical Association journal* 1973;108(1):39-42.
36. Klemp P, Halland AM, Majoos FL, Steyn K. Musculoskeletal manifestations in hyperlipidaemia: a controlled study. *Ann. Rheum. Dis.* 1993;52(1):44-8.
37. Kwak M, Yoon, S., Cho, Y., Hong, S., Park, J., Oh, S., Jeon, D & Yang, J. The Correlation Between Achilles Tendon Thickness and Cardiovascular Risk Factors. *Journal of Lipid and Atherosclerosis* 2013;2(2):77-83.
38. Descamps OS, Leysen X, Van Leuven F, Heller FR. The use of Achilles tendon ultrasonography for the diagnosis of familial hypercholesterolemia. *Atherosclerosis* 2001;157(2):514-8.
39. Durrington PN, Adams JE, Beastall MD. The assessment of Achilles tendon size in primary hypercholesterolaemia by computed tomography. *Atherosclerosis* 1982;45(3):345-58.
40. Mabuchi H, Ito S, Haba T. Discrimination of familial hypercholesterolemia and secondary hypercholesterolemia by Achilles' tendon thickness. *Atherosclerosis* 1977;28(1):61-67.
41. Mabuchi H, Tatami R, Haba T, Ueda K, Ueda R, Ito S, et al. Achilles tendon thickness and ischemic heart disease in familial hypercholesterolemia. *Metabolism* 1978;27(11):1672-9.
42. Yuzawa K, Yamakawa K, Tohno E, Seki M, Akisada M, Yanagi H, et al. An ultrasonographic method for detection of Achilles tendon xanthomas in familial hypercholesterolemia. *Atherosclerosis* 1989;75(2-3):211-8.
43. Rechartd M, Shiri R, Lindholm H, Karppinen J, Viikari-Juntura E. Associations of metabolic factors and adipokines with pain in incipient upper extremity soft tissue disorders: a cross-sectional study. *BMJ open* 2013;3(8):e003036.
44. Klemp P, Halland AM, Majoos FL, Steyn K. Musculoskeletal manifestations in hyperlipidaemia: a controlled study. *Annals of the rheumatic diseases* 1993;52(1):44-8.
45. Borenstein M, Hedges, L., Higgins, J. & Rothstein, H. *Introduction to Meta-Analysis*. UK: John Wiley & Sons, 2008.
46. Hamburg NM, McMackin CJ, Huang AL, Shenouda SM, Widlansky ME, Schulz E, et al. Physical inactivity rapidly induces insulin resistance and microvascular dysfunction in healthy volunteers. *Arteriosclerosis, thrombosis, and vascular biology* 2007;27(12):2650-6.
47. Olsen RH, Krogh-Madsen R, Thomsen C, Booth FW, Pedersen BK. Metabolic responses to reduced daily steps in healthy nonexercising men. *JAMA : the journal of the American Medical Association* 2008;299(11):1261-3.
48. Yamakawa K, Yanagi, H., Saku, K., Sasaki, J., Okafuji, T., Shimakura, Y., Kawai, K., Tsuchiya, S., Takada, K., Naito, S., Arakawa, K. & Hamaguchi, H. . Family studies of the LDL receptor gene of relatively severe hereditary hypercholesterolemia associated with Achilles tendon xanthomas *Human Genetics* 1991;86(5):445-49.

49. Beason DP, Abboud JA, Kuntz AF, Bassora R, Soslowsky LJ. Cumulative effects of hypercholesterolemia on tendon biomechanics in a mouse model. *Journal of orthopaedic research : official publication of the Orthopaedic Research Society* 2011;29(3):380-3.
50. Beason DP, Hsu JE, Marshall SM, McDaniel AL, Temel RE, Abboud JA, et al. Hypercholesterolemia increases supraspinatus tendon stiffness and elastic modulus across multiple species. *J Shoulder Elbow Surg* 2013;22(5):681-6.
51. de Oliveira LP, Vieira CP, Da Re Guerra F, de Almeida Mdos S, Pimentel ER. Statins induce biochemical changes in the Achilles tendon after chronic treatment. *Toxicology* 2013;311(3):162-8.
52. Pasternak B, Schepull T, Eliasson P, Aspenberg P. Elevation of systemic matrix metalloproteinases 2 and 7 and tissue inhibitor of metalloproteinase 2 in patients with a history of Achilles tendon rupture: pilot study. *British journal of sports medicine* 2010;44(9):669-72.
53. Ku D. Blood flow in arteries. *Annual Review of Fluid Mechanics* 1997;29:399-434.
54. Manley G, Hawksworth J. Distribution of mucopolysaccharides in the human vascular tree. *Nature* 1965;206(989):1152-3.
55. Linton MF, Fazio S. Macrophages, inflammation, and atherosclerosis. *International journal of obesity and related metabolic disorders : journal of the International Association for the Study of Obesity* 2003;27 Suppl 3:S35-40.
56. Benjamin M, Qin S, Ralphs JR. Fibrocartilage associated with human tendons and their pulleys. *Journal of anatomy* 1995;187 ( Pt 3):625-33.
57. Adams CW, Bayliss OB. Acid mucosubstances underlying lipid deposits in ageing tendons and atherosclerotic arteries. *Atherosclerosis* 1973;18(2):191-5.
58. Volker W, Schmidt A, Oortmann W, Broszcy T, Faber V, Buddecke E. Mapping of proteoglycans in atherosclerotic lesions. *European heart journal* 1990;11 Suppl E:29-40.
59. Egger M, Zellweger-Zahner T, Schneider M, Junker C, Lengeler C, Antes G. Language bias in randomised controlled trials published in English and German. *Lancet* 1997;350(9074):326-9.
60. Langsted A, Freiberg JJ, Nordestgaard BG. Fasting and nonfasting lipid levels: influence of normal food intake on lipids, lipoproteins, apolipoproteins, and cardiovascular risk prediction. *Circulation* 2008;118(20):2047-56.
